# Supplementary material for: Bioorthogonal activation of prodrugs, for the potential treatment of breast cancer, using the Staudinger reaction
Source: Royal Society of Chemistry journal article supplement (doi:10.1039/d3md00137g), 2023-01-01
Supplement: d3md00137g1.pdf [file d3md00137g1.pdf]

## Supporting Information

### **Bioorthogonal activation of prodrugs, for the potential treatment of breast cancer, using the Staudinger reaction**

Madonna M. A. Mitry <sup>a,b</sup>, Samuel Y Boateng <sup>c</sup>, Francesca Greco <sup>a\*</sup>, Helen M.I. Osborn <sup>a\*</sup>

<sup>a</sup> Reading School of Pharmacy, University of Reading, Whiteknights, Reading, RG6 6AD. UK

<sup>b</sup> Dept. of Pharmaceutical chemistry, Faculty of Pharmacy, Ain Shams University, Cairo 11566, Egypt

<sup>c</sup> School of Biological Sciences, University of Reading, Whiteknights, Reading RG6 6UB, UK

\*Corresponding author, E-mail: [h.m.i.osborn@reading.ac.uk](mailto:h.m.i.osborn@reading.ac.uk) , [f.greco@reading.ac.uk](mailto:f.greco@reading.ac.uk)

#### **Table of contents**

|                                                                                                                           |           |
|---------------------------------------------------------------------------------------------------------------------------|-----------|
| Chromatograms of 9-azido sialic acid <b>4</b> with DOX prodrug <b>12</b> and <i>N</i> -Mustard prodrug <b>10</b> .....    | <b>2</b>  |
| Viability of MCF-7 cells and L929 cells after treatment with Ac <sub>4</sub> ManNAz, <b>4</b> or <b>5</b> .....           | <b>2</b>  |
| IC <sub>50</sub> of DOX prodrug <b>12</b> and <i>N</i> -Mustard prodrug <b>10</b> against MCF-7 cells and L929 cells..... | <b>3</b>  |
| Confocal microscopy images of untreated, Ac <sub>4</sub> ManNAz, <b>4</b> and <b>5</b> -treated MCF-7 cells.....          | <b>4</b>  |
| <sup>1</sup> H, <sup>13</sup> C and <sup>31</sup> P NMR spectra.....                                                      | <b>6</b>  |
| HPLC traces analysis of compounds <b>4</b> , <b>5</b> , <b>10</b> and <b>12</b> .....                                     | <b>17</b> |

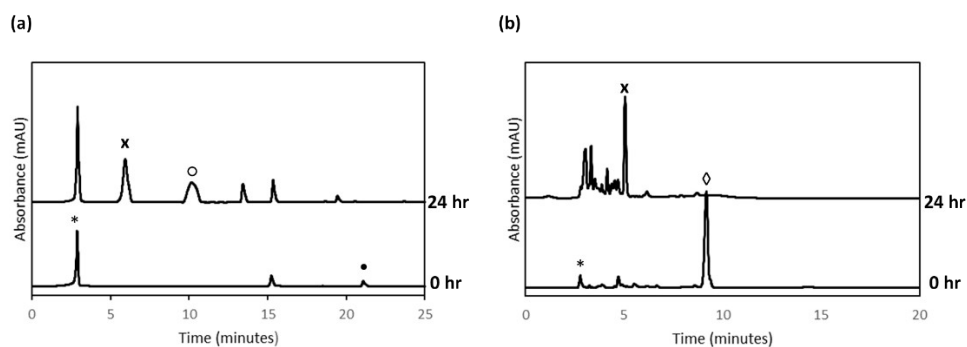

Figure S1: a) HPLC chromatograph of doxorubicin **11** release from prodrug **12** by 9-azido sialic acid **4** at 37 C° in aqueous MeCN (1:1) as a function of time. b) HPLC chromatogram of *N*-Mustard release from prodrug **10** by 9-azido sialic acid **4** at 37 C° in aqueous MeCN (1:1) as a function of time. Legend: \*: azido-sialic acid **4**; •: Dox prodrug **12**; o: Dox **11**; x: phosphine-oxide ligation product; ◊: *N*-Mustard prodrug **10**.

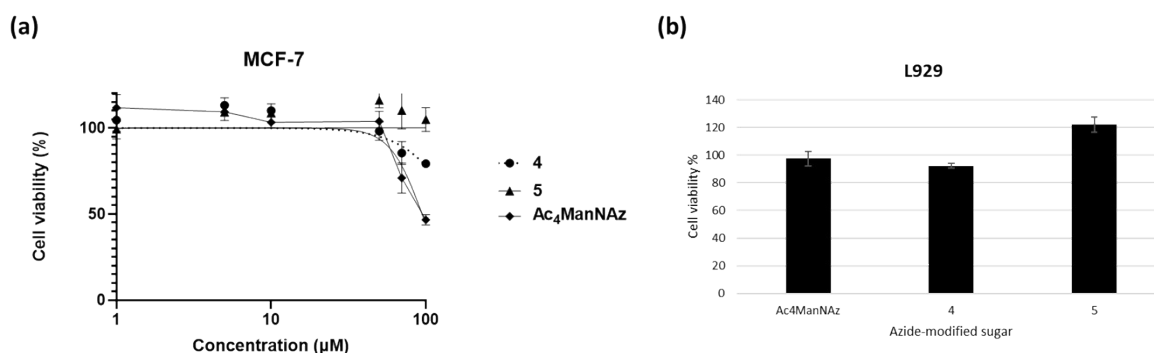

Figure S2: a) Viability of MCF-7 cells after incubation with Ac<sub>4</sub>ManNAz, **4** or **5** at various concentrations (1-100 μM) determined by the MTT assay. b) Viability of L929 cells after incubation with 50 μM Ac<sub>4</sub>ManNAz, **4** or **5** determined by the MTT assay. Data are presented as mean ± SEM (n = 3).

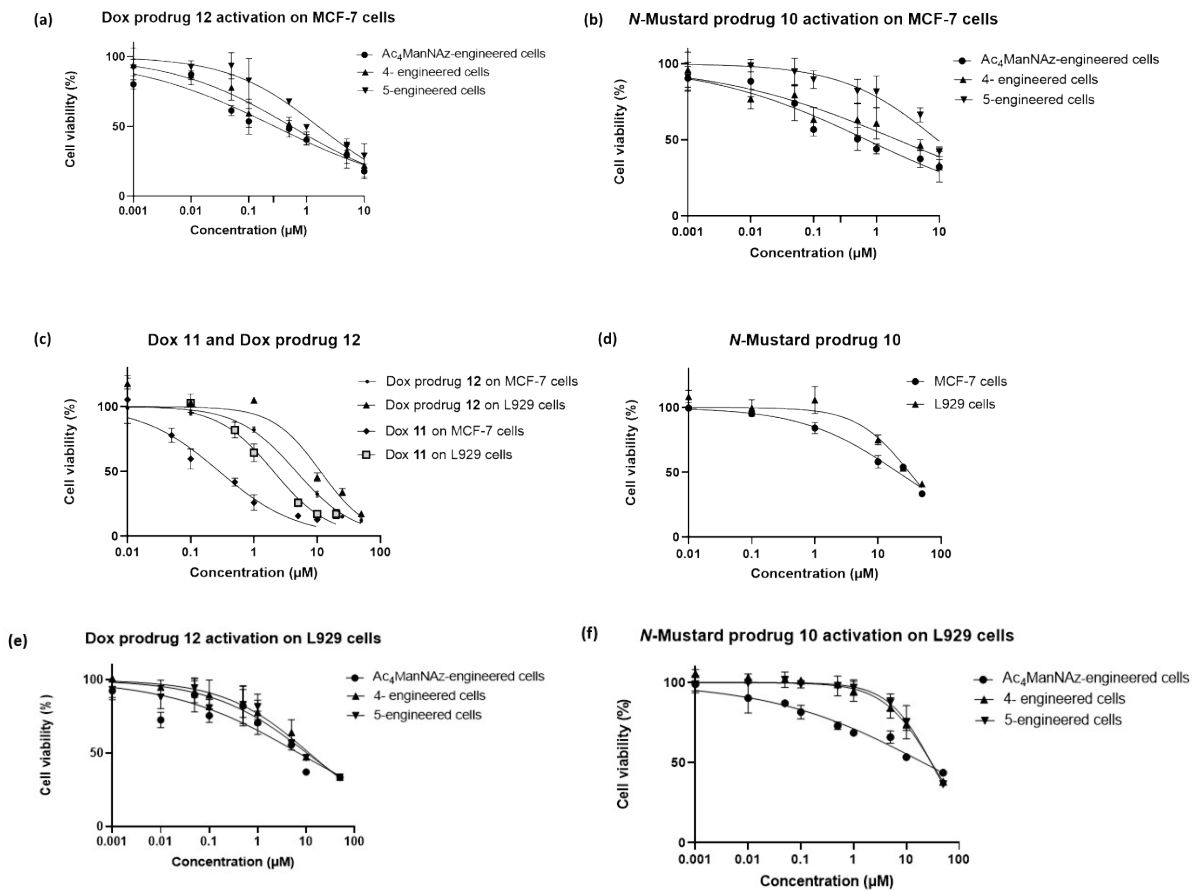

Figure S3: a) Determined IC<sub>50</sub> for Dox prodrug **12** activation against **4**, **5** and Ac<sub>4</sub>ManNAz-engineered MCF-7 cells. b) Determined IC<sub>50</sub> for N-Mustard prodrug **10** activation against **4**, **5** and Ac<sub>4</sub>ManNAz-engineered MCF-7 cells. c) Determined IC<sub>50</sub> of Dox **11** and Dox prodrug **12** against MCF-7 cells and L929 cells. d) Determined IC<sub>50</sub> of N-Mustard prodrug **10** against MCF-7 cells and L929 cells. e) Determined IC<sub>50</sub> for Dox prodrug **12** activation against **4**, **5** and Ac<sub>4</sub>ManNAz-engineered L929 cells. f) Determined IC<sub>50</sub> for N-Mustard prodrug **10** activation against **4**, **5** and Ac<sub>4</sub>ManNAz-engineered L929 cells. Data are presented as mean ± SEM (n=3).



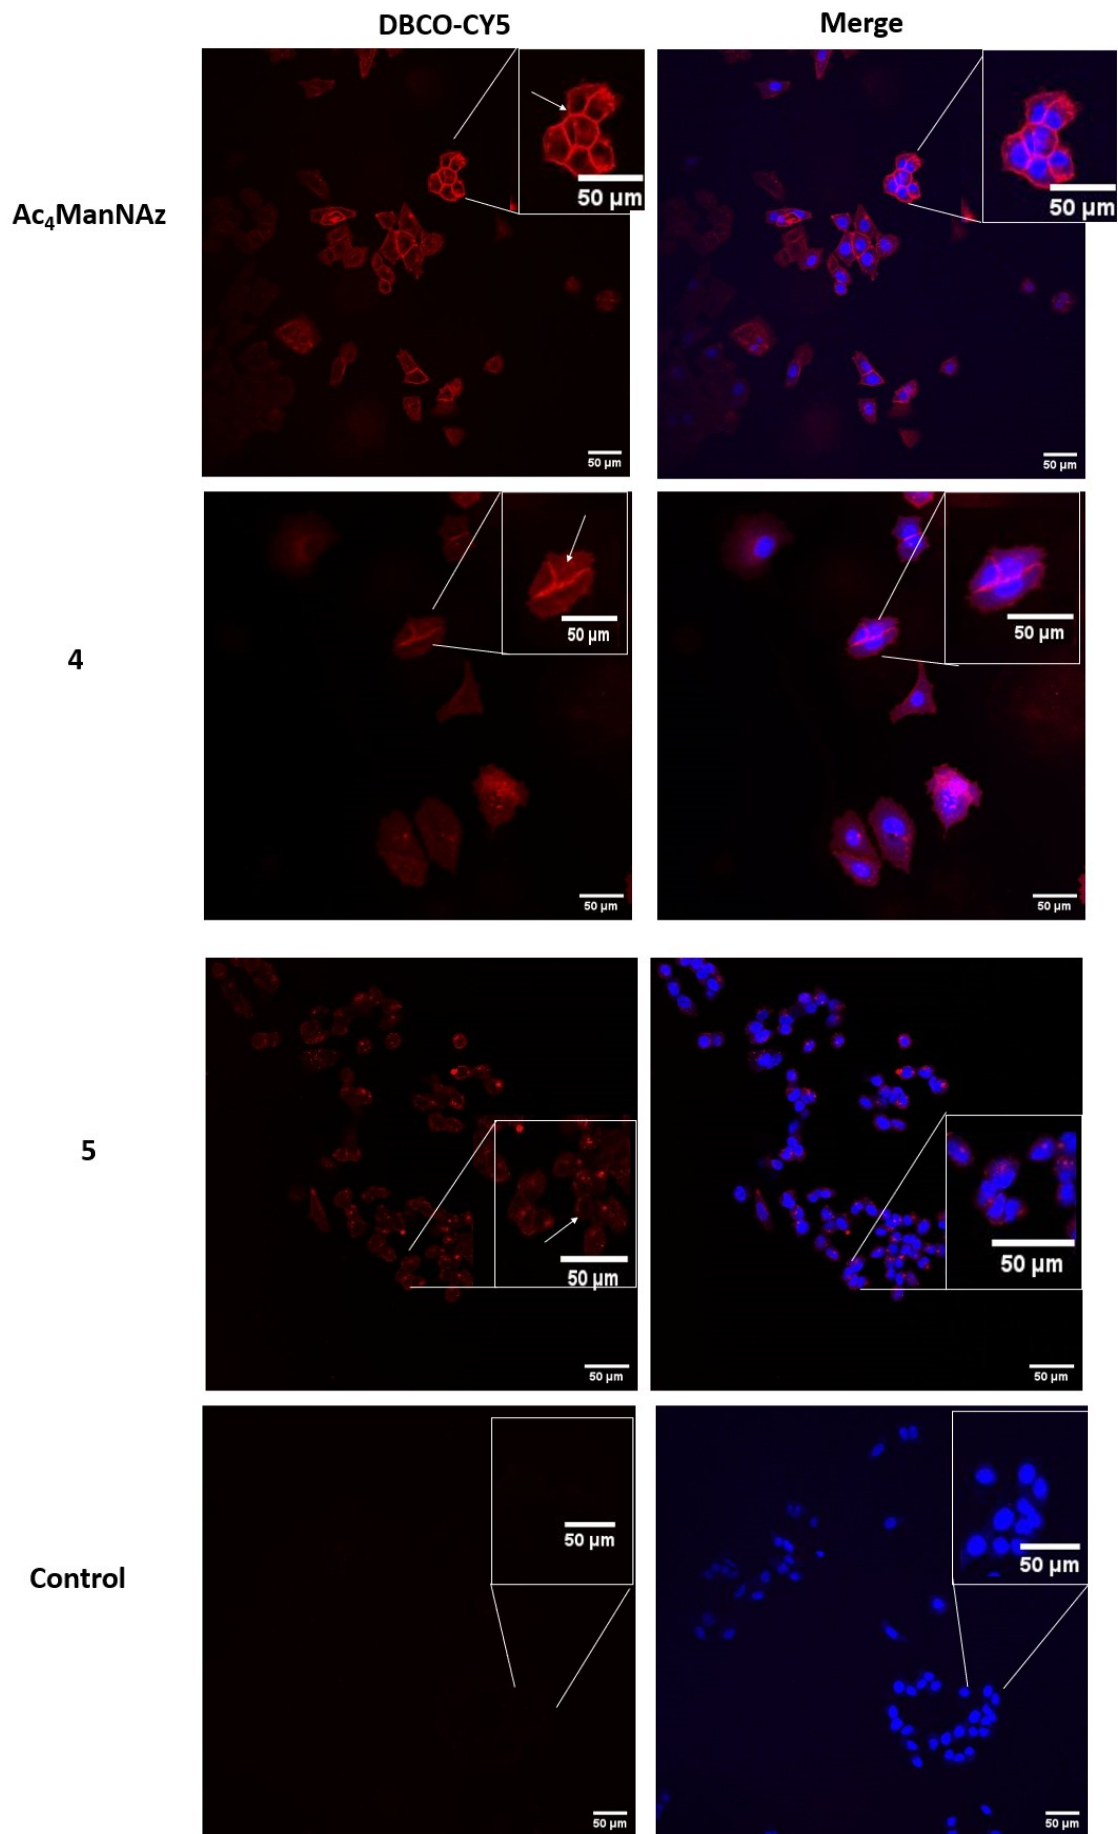

Figure S4: Confocal fluorescence microscopy images of Ac<sub>4</sub>ManNAz, **4**, **5**-treated and untreated control breast cancer cells (MCF-7) (50 μM for 72 h). Arrows indicate higher fluorescence at cell membranes and cell membrane junctions between cells.

# $^1\text{H}$ and $^{13}\text{C}$ NMR Spectra

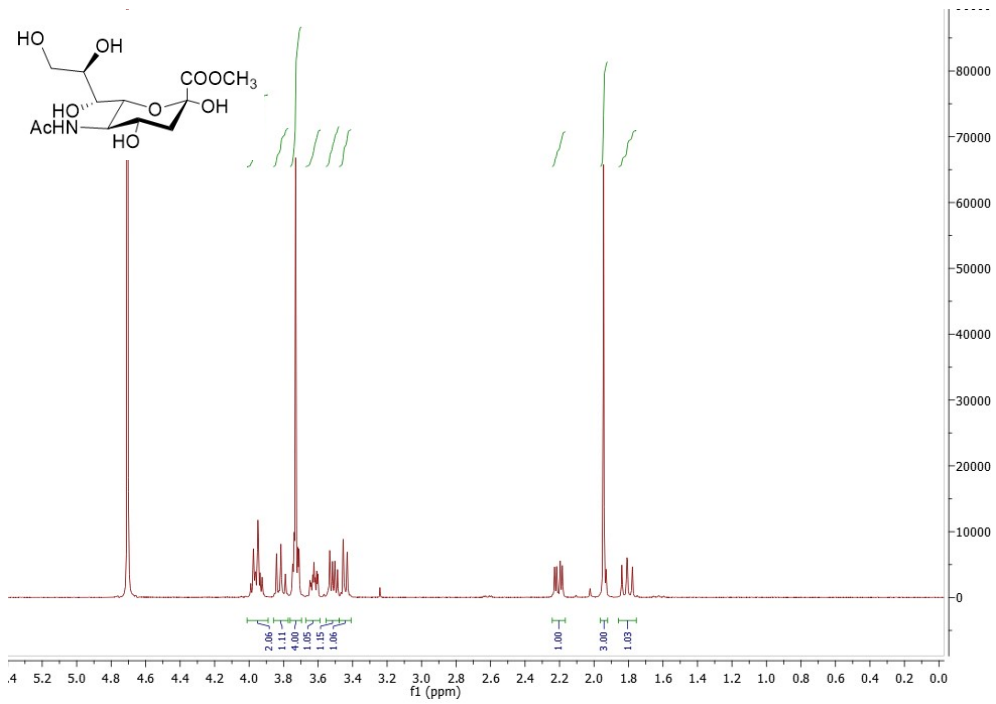

$^1\text{H}$  NMR spectrum (400 MHz,  $\text{D}_2\text{O}$ ) of compound **2**

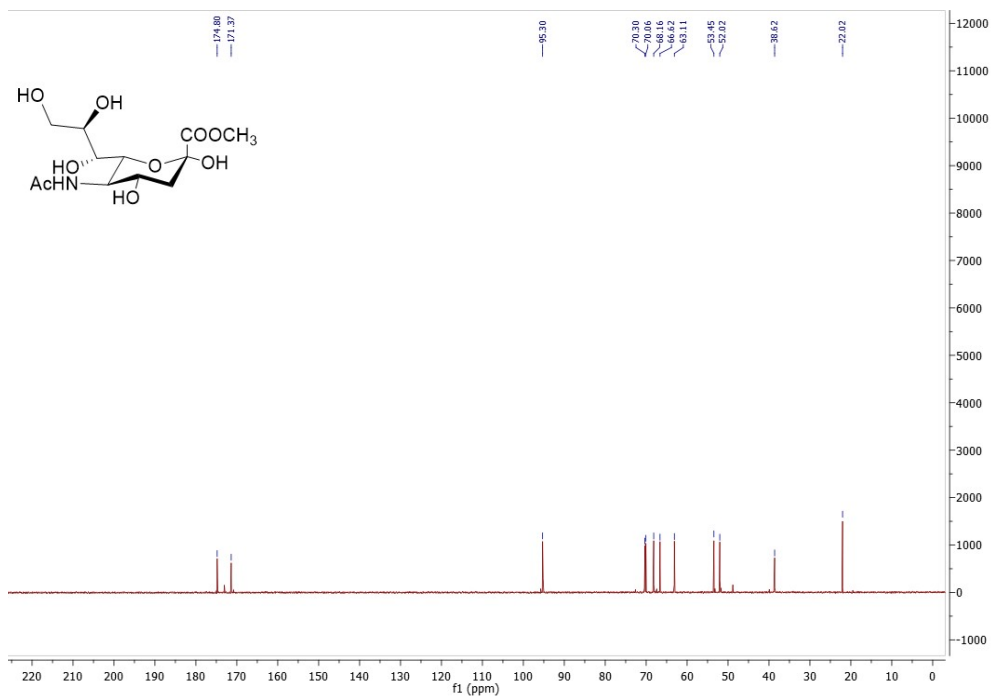

$^{13}\text{C}$  NMR spectrum (100 MHz,  $\text{D}_2\text{O}$ ) of compound **2**

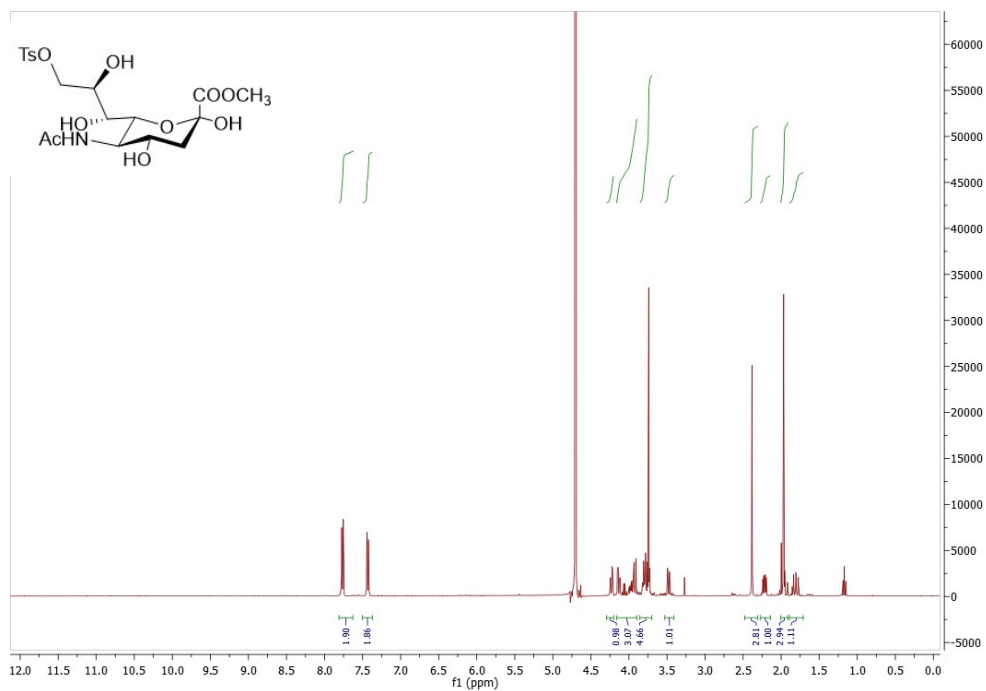

<sup>1</sup>H NMR spectrum (400 MHz, D<sub>2</sub>O) of compound **3**

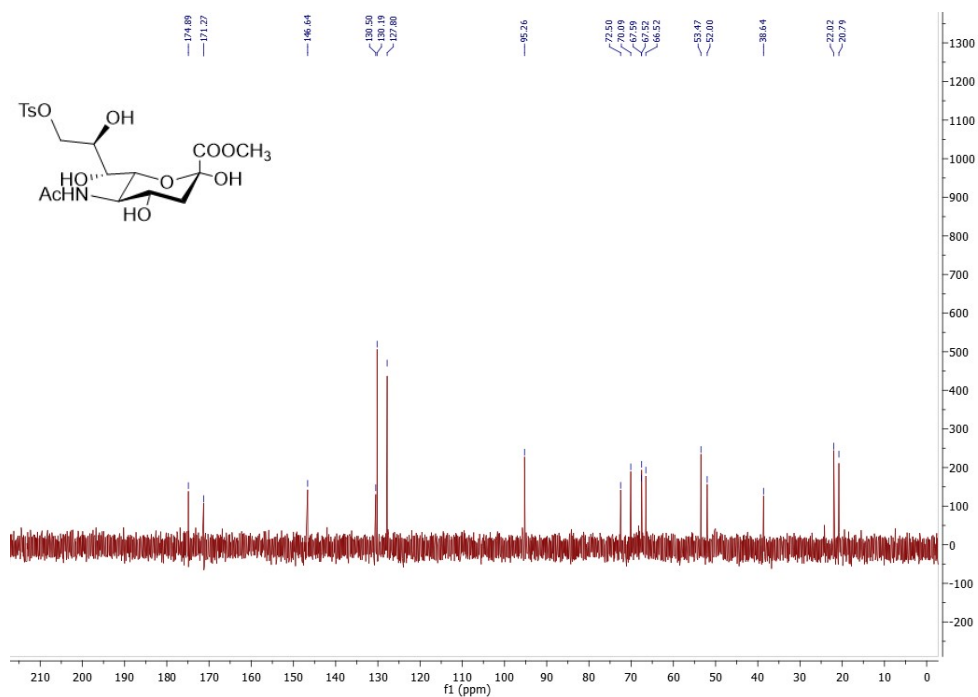

<sup>13</sup>C NMR spectrum (100 MHz, D<sub>2</sub>O) of compound **3**



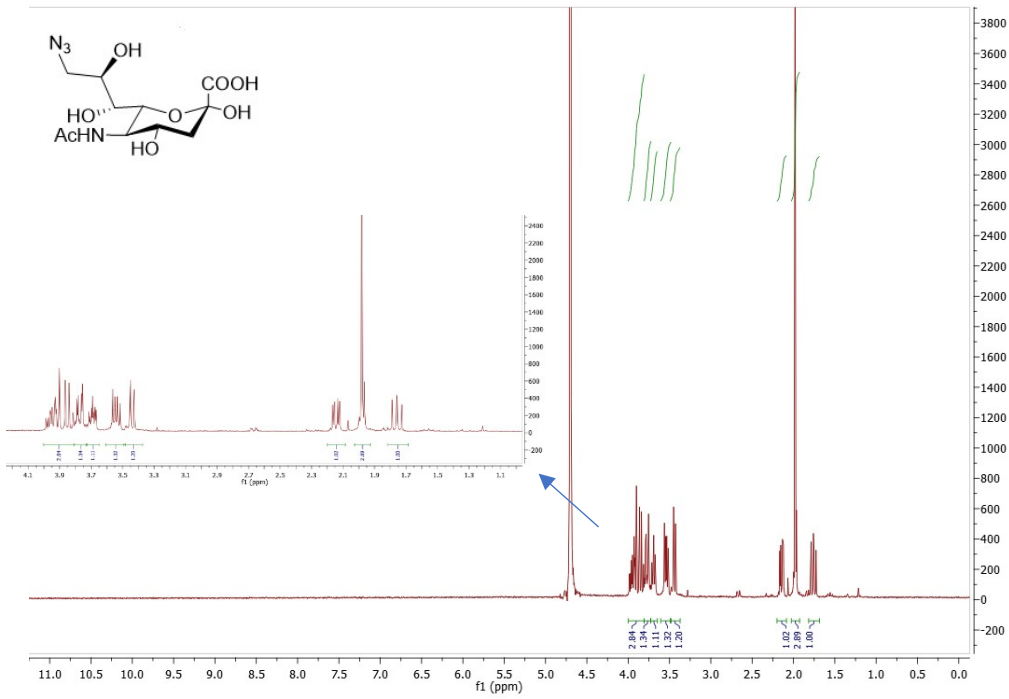

<sup>1</sup>H NMR spectrum (400 MHz, D<sub>2</sub>O) of compound 4

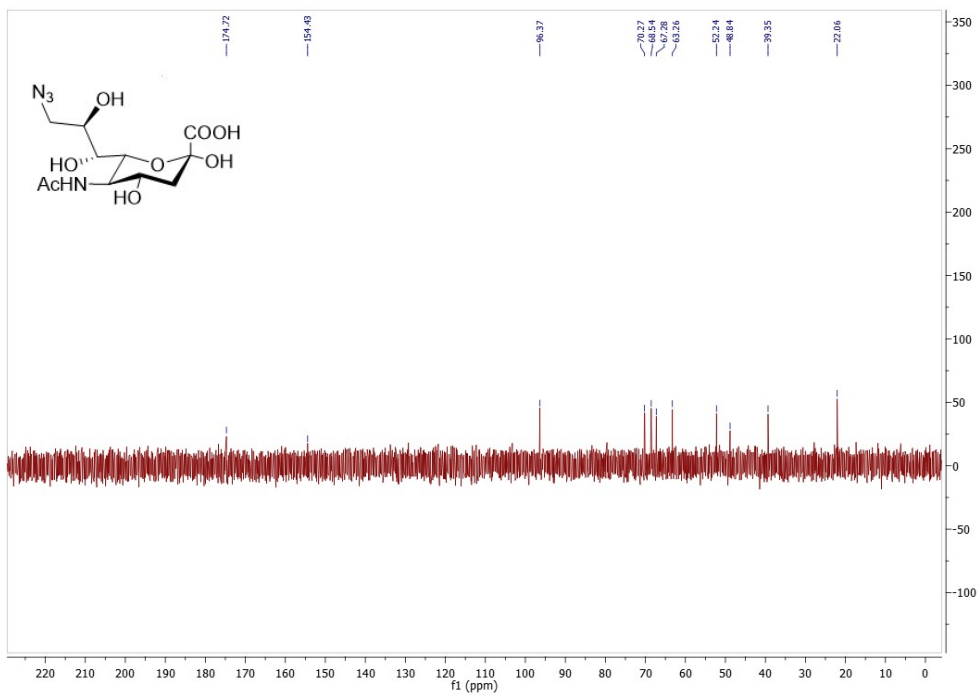

<sup>13</sup>C NMR spectrum (100 MHz, D<sub>2</sub>O) of compound 4

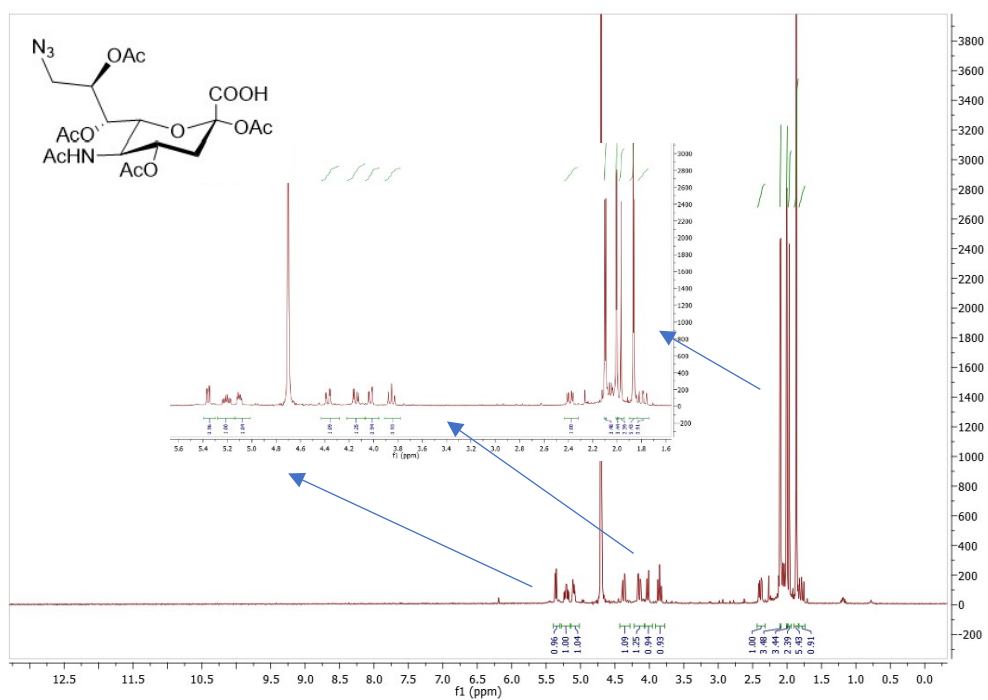

**<sup>1</sup>H NMR spectrum (400 MHz, D<sub>2</sub>O) of compound 5**

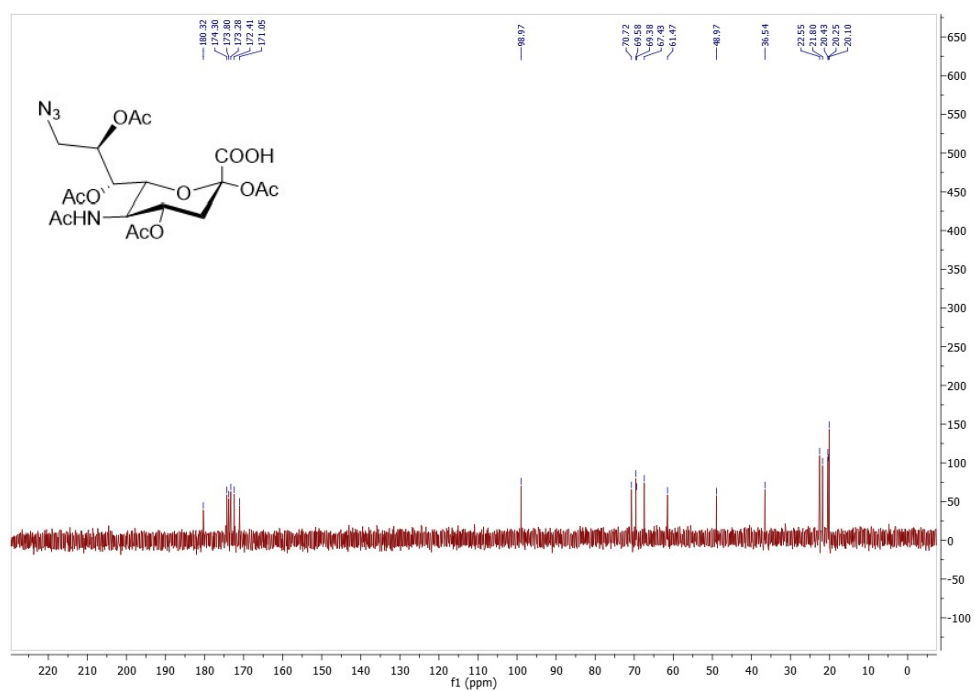

**<sup>13</sup>C NMR spectrum (100 MHz, D<sub>2</sub>O) of compound 5**

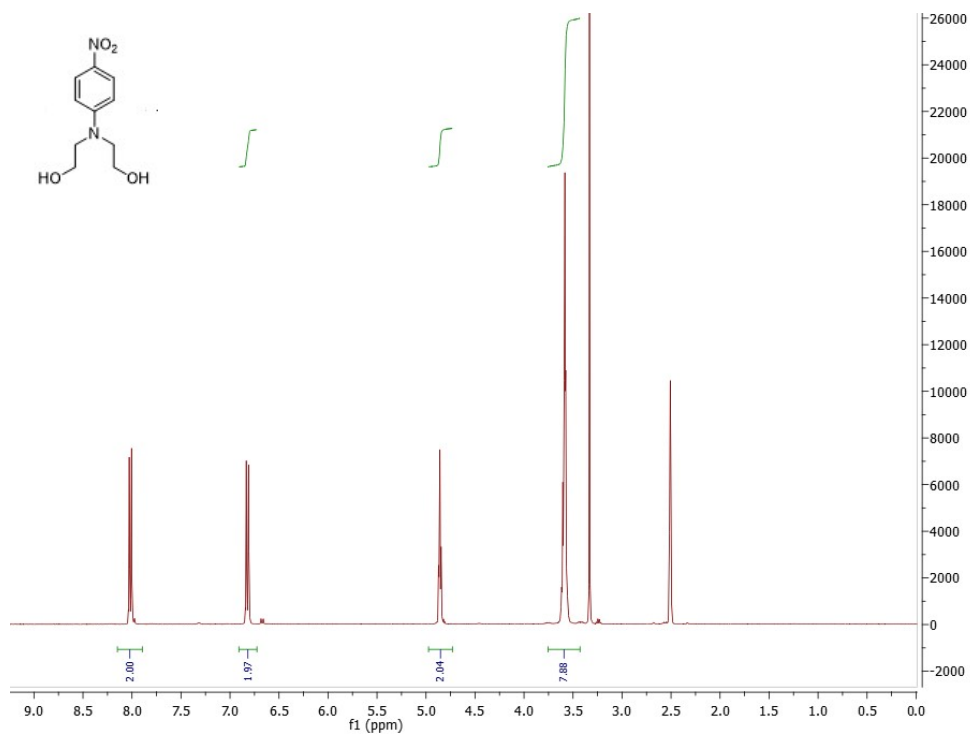

<sup>1</sup>H NMR spectrum (400 MHz, DMSO-*d*<sub>6</sub>) of compound 7

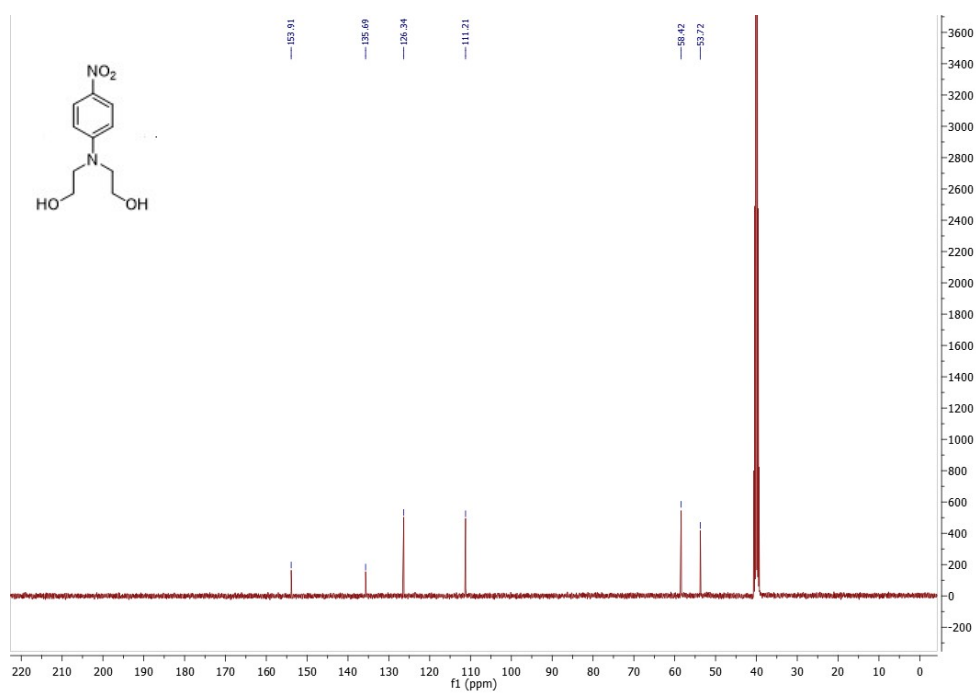

<sup>13</sup>C NMR spectrum (100 MHz, DMSO-*d*<sub>6</sub>) of compound 7

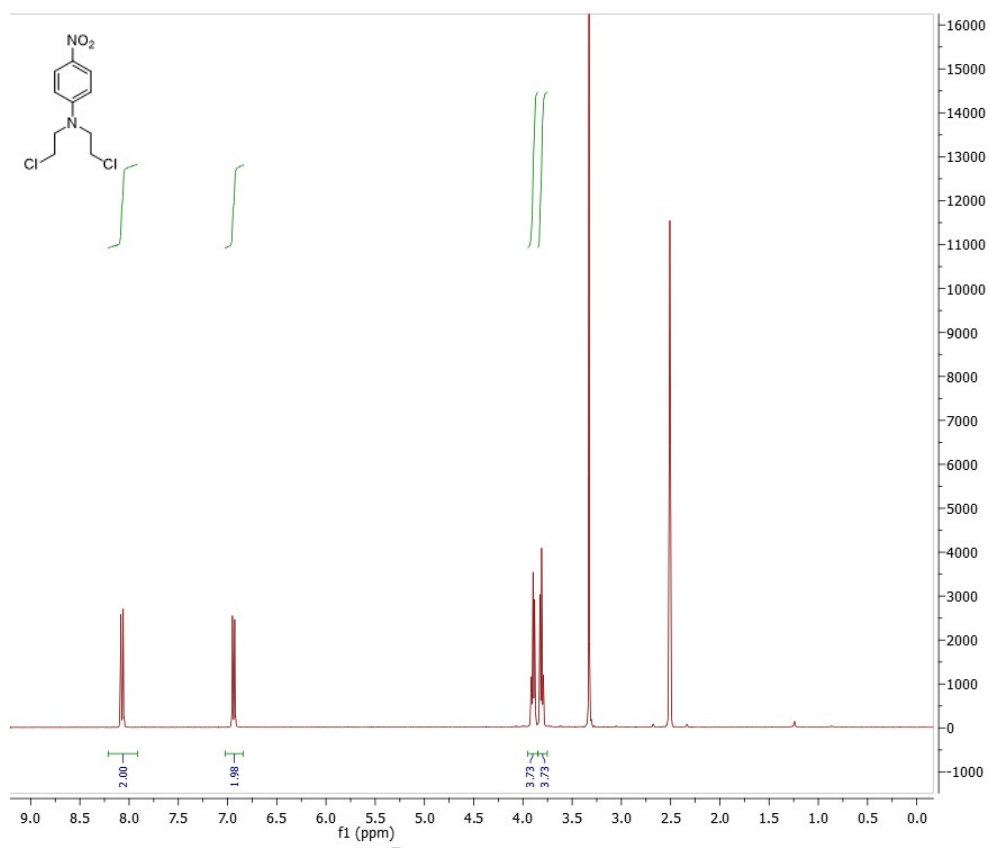

<sup>1</sup>H NMR spectrum (400 MHz, DMSO-d<sub>6</sub>) of compound 8

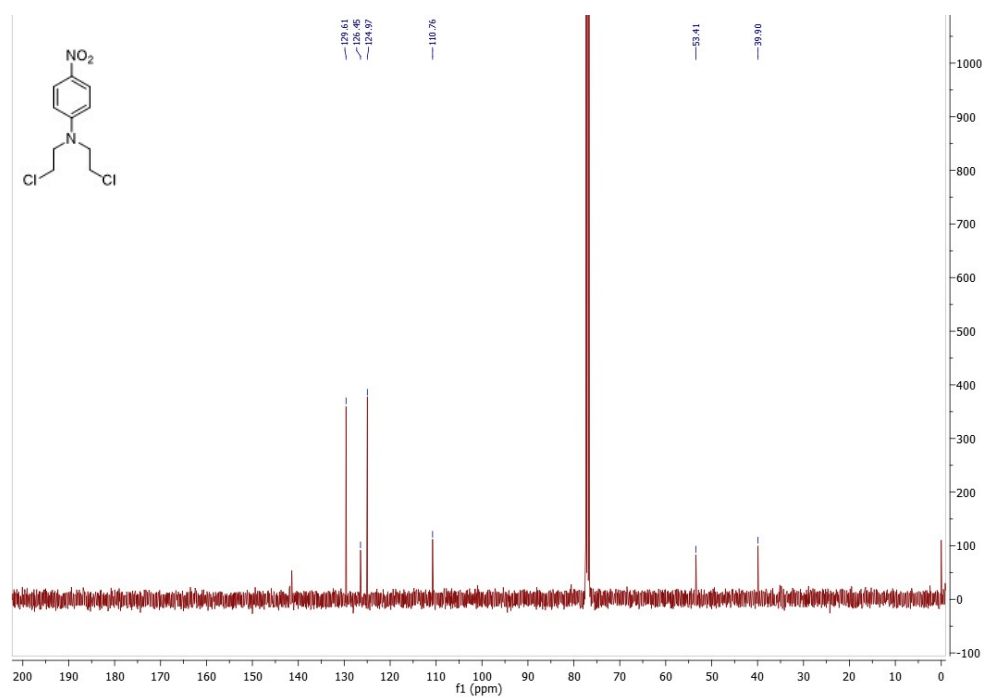

<sup>13</sup>C NMR spectrum (100 MHz, CDCl<sub>3</sub>) of compound 8

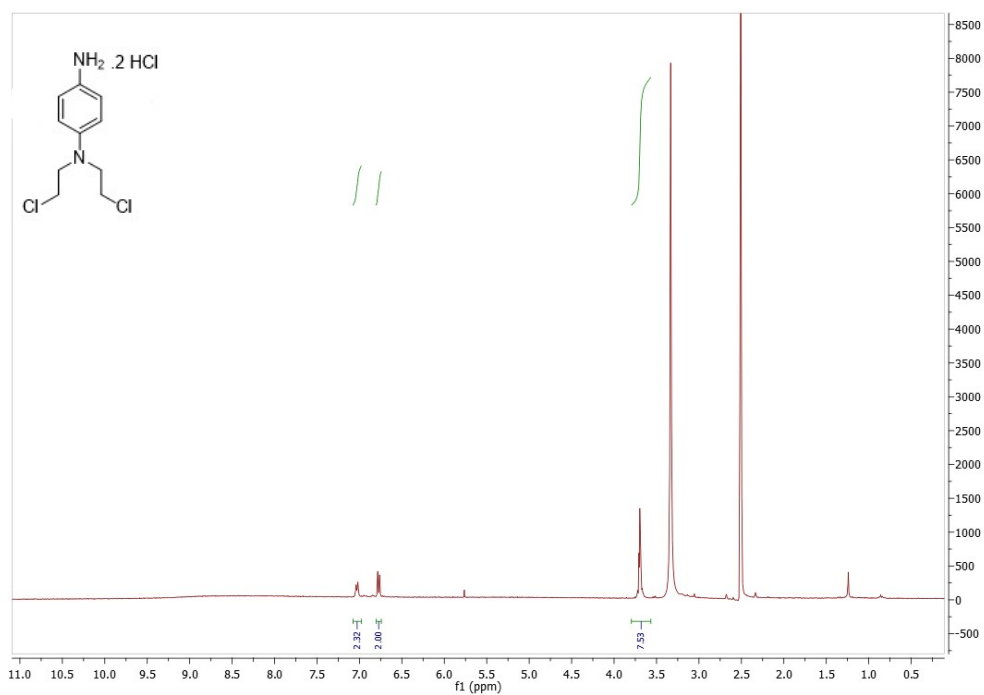

<sup>1</sup>H NMR spectrum (400 MHz, DMSO-*d*<sub>6</sub>) of compound **9**

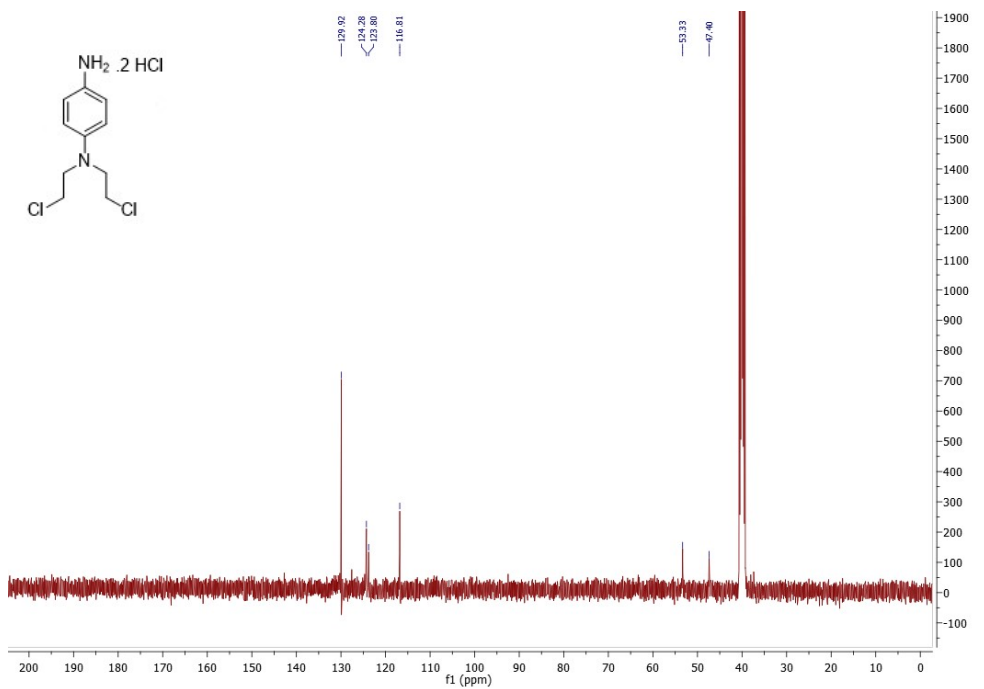

<sup>13</sup>C NMR spectrum (100 MHz, DMSO-*d*<sub>6</sub>) of compound **9**

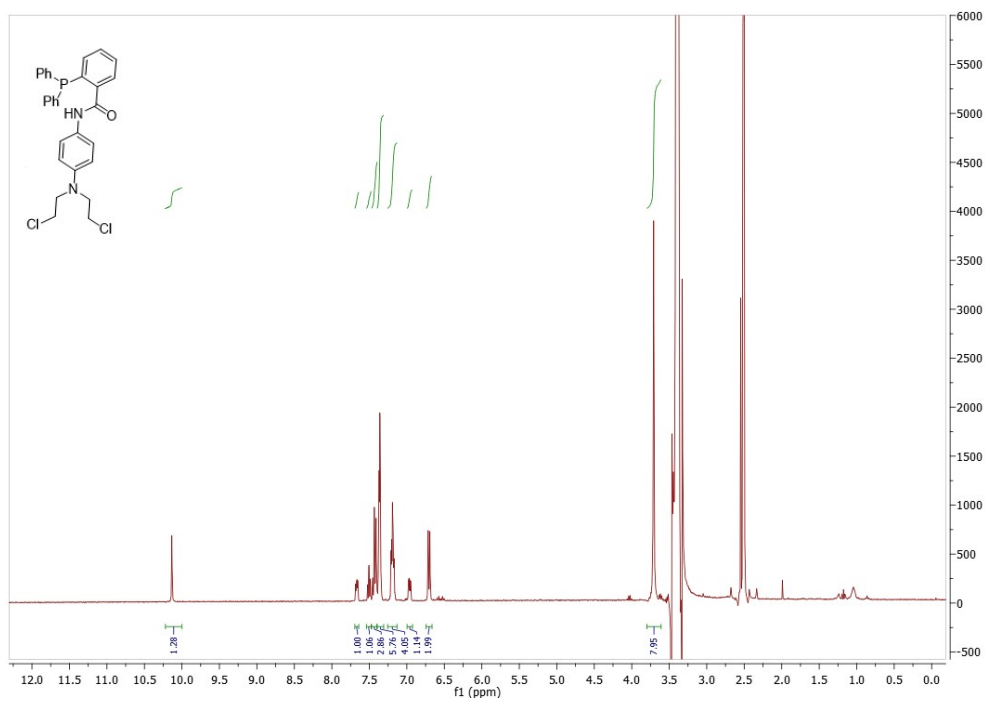

<sup>1</sup>H NMR spectrum (400 MHz, DMSO-*d*<sub>6</sub>) of compound 10

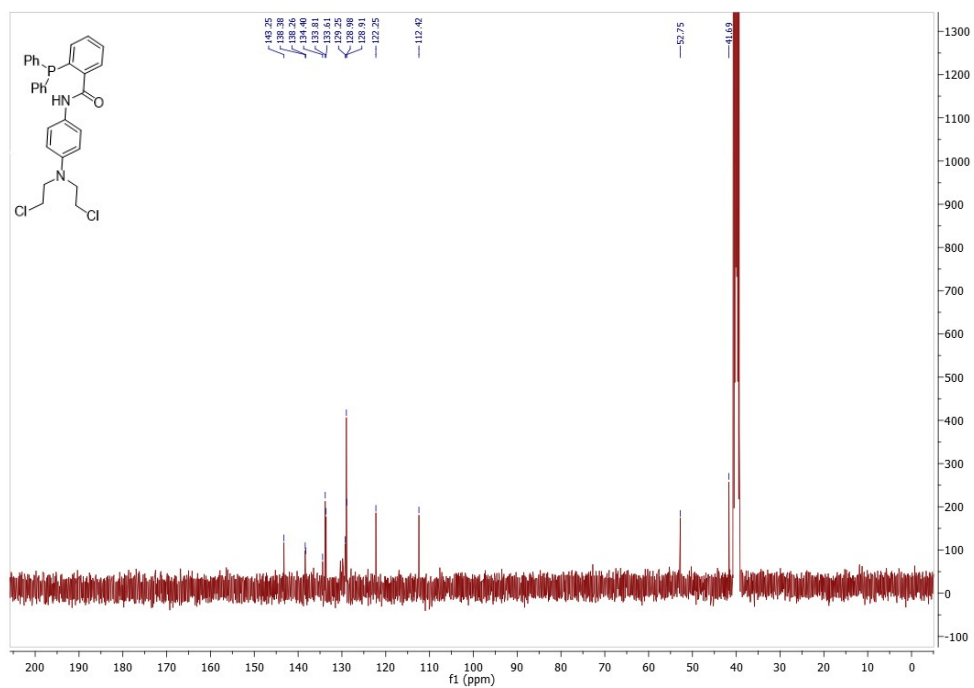

<sup>13</sup>C NMR spectrum (100 MHz, DMSO-*d*<sub>6</sub>) of compound 10

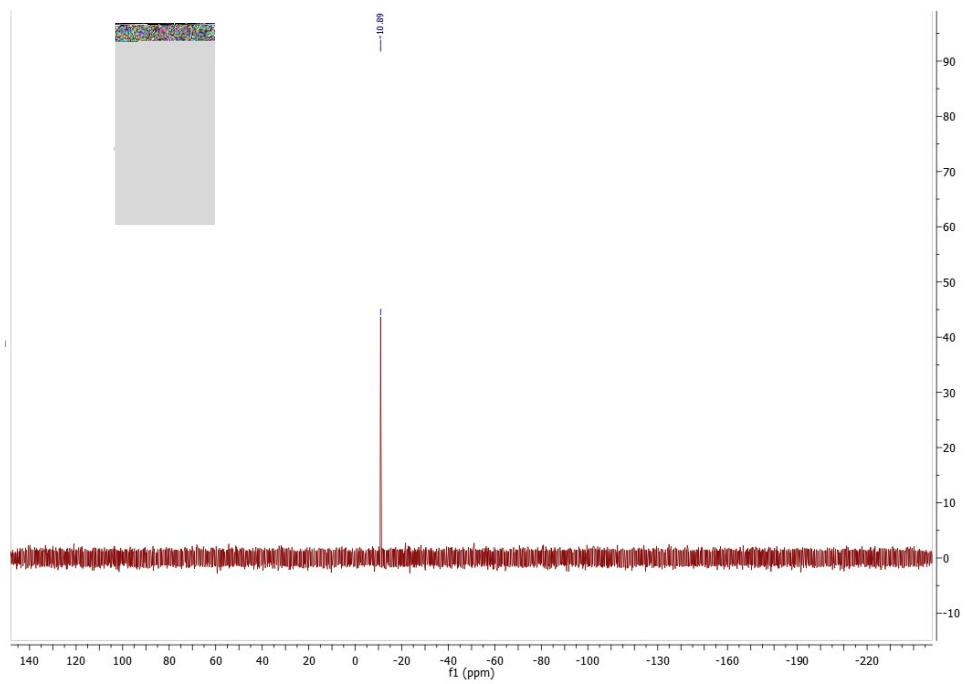

$^{31}\text{P}$  NMR spectrum (162 MHz,  $\text{DMSO-}d_6$ ) of compound **10**

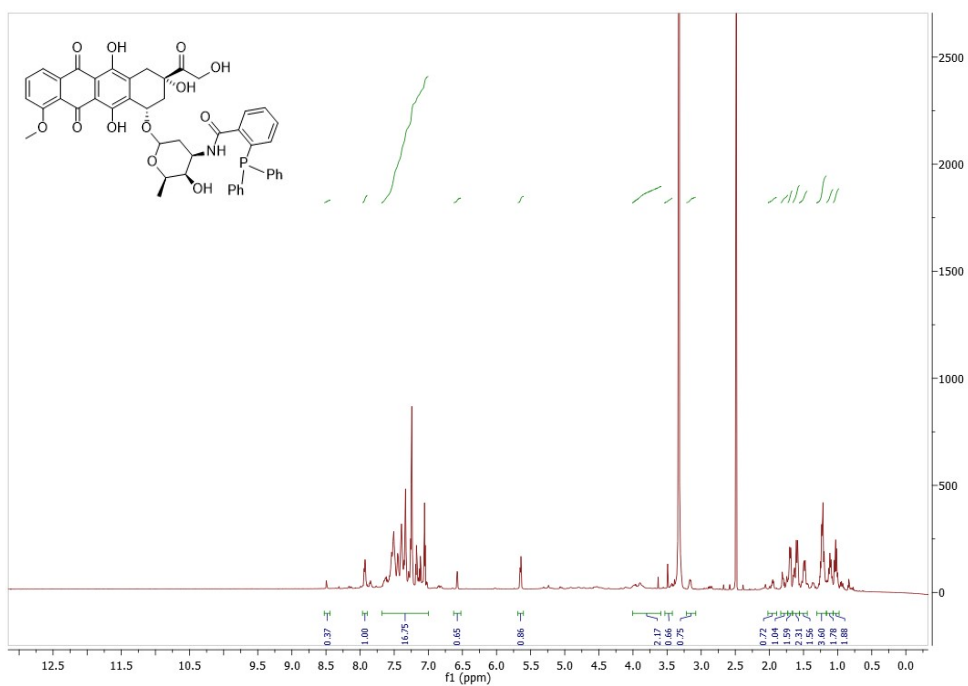

<sup>1</sup>H NMR spectrum (700 MHz, DMSO-*d*<sub>6</sub>) of compound **12**

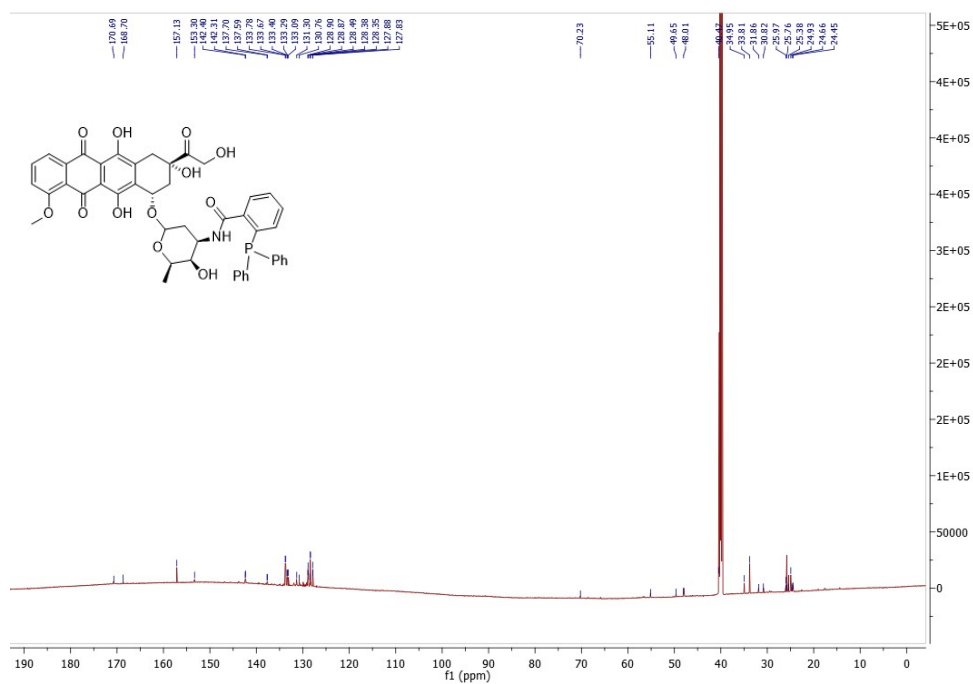

<sup>13</sup>C NMR spectrum (176 MHz, DMSO-*d*<sub>6</sub>) of compound **12**



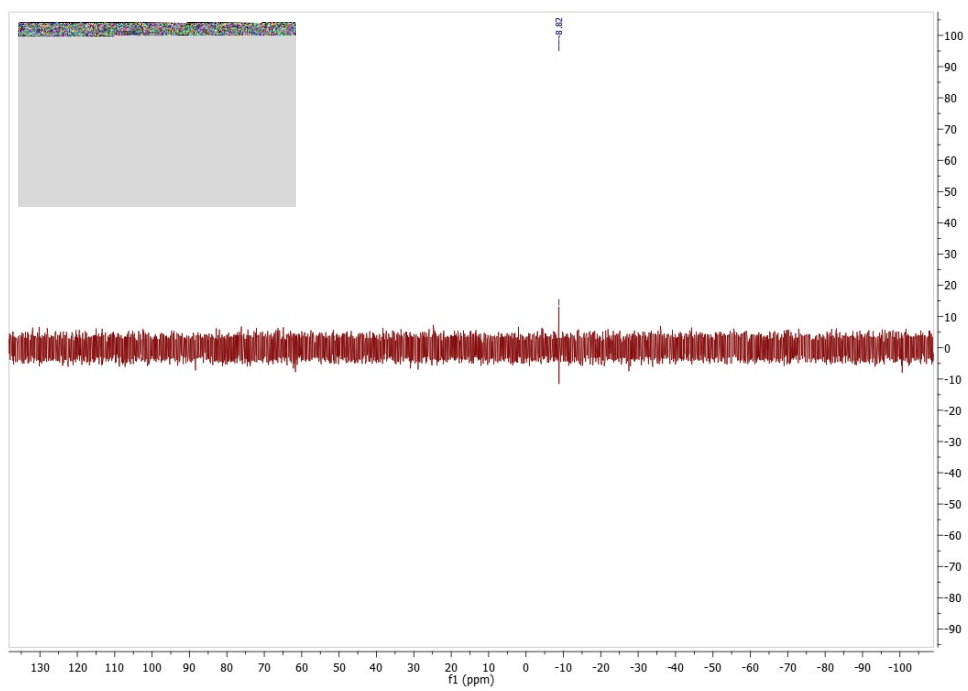

$^{31}\text{P}$  NMR spectrum (162 MHz,  $\text{DMSO-}d_6$ ) of compound **12**

## HPLC traces of final compounds 4, 5, 10 and 12

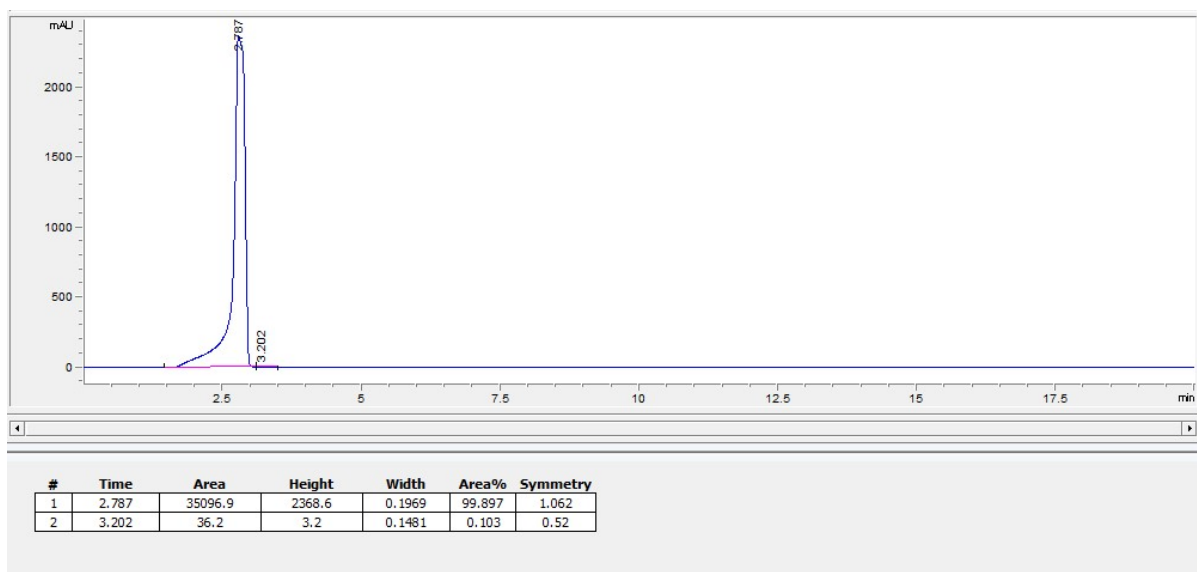

The HPLC trace of compound 4

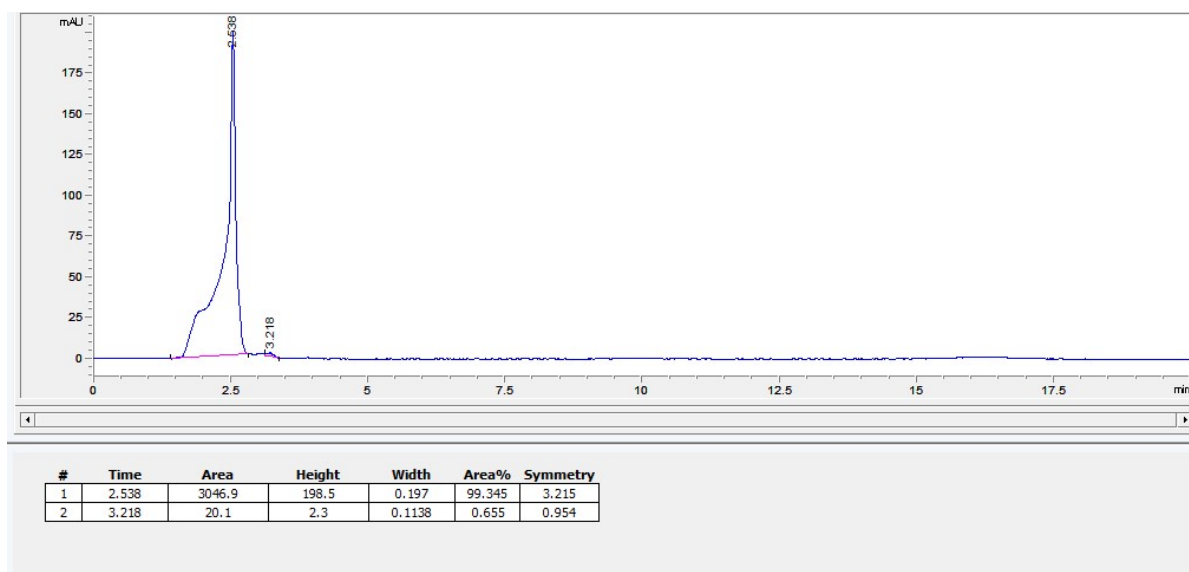

The HPLC trace of compound 5

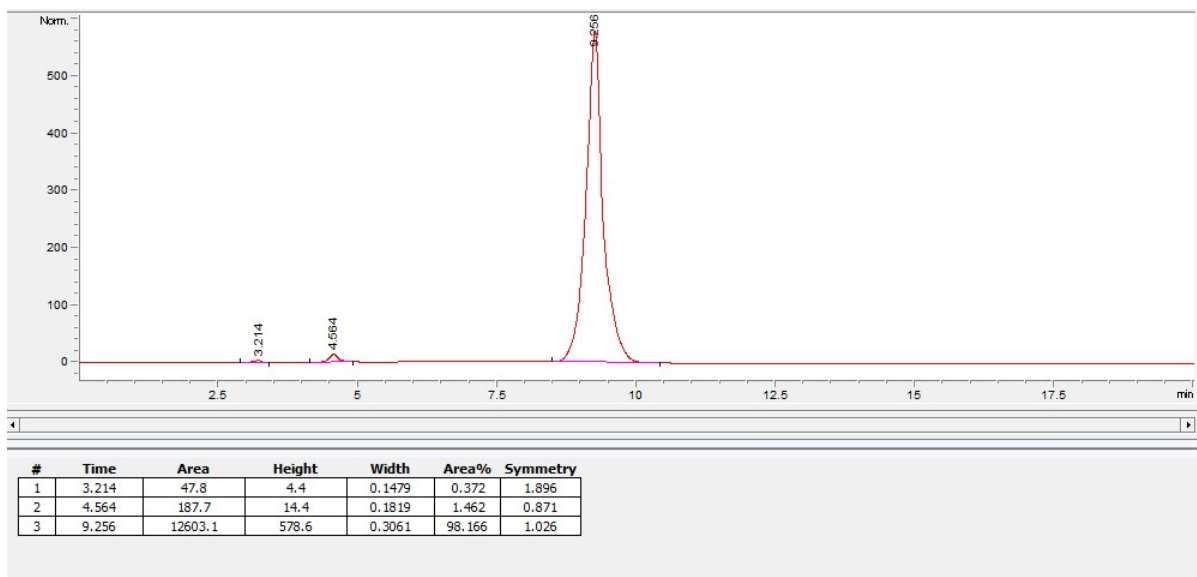

The HPLC trace of compound **10**

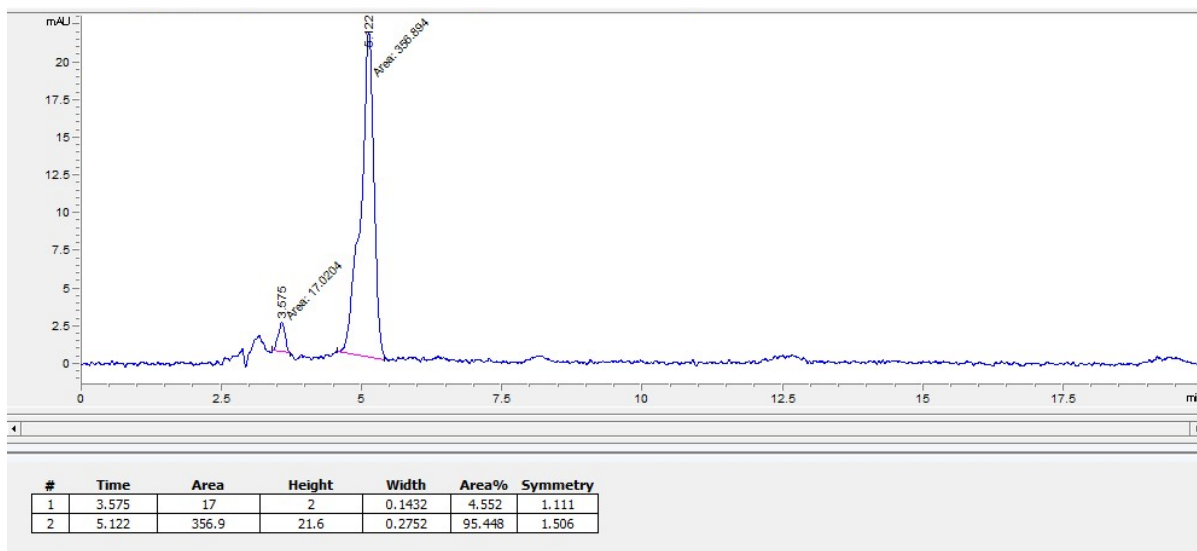

The HPLC trace of compound **12**
